# Supplementary material for: Ectopic Expression of Retrotransposon-Derived PEG11/RTL1 Contributes to the Callipyge Muscular Hypertrophy
Source: PLoS One. 2015 Oct 16;10(10):e0140594. doi: 10.1371/journal.pone.0140594 (PMC4608697; doi:10.1371/journal.pone.0140594)
Supplement: S3 Table — (XLSX) [file pone.0140594.s007.xlsx]

## Sheet: S3 Table
S3 Table. Live weights of the oPEG11 (line 126) F2 mice between weaning and 10 weeks of age.
Age1	Sample size			Live weight (g) : Mean ± 1.96 s.e.m.						Effect of variable2		Genotype effect to +/+2
				Female			Male			p-value		% increase		p-value
	+/+	+/TP	TP/TP	+/+	+/TP	TP/TP	+/+	+/TP	TP/TP	Sex	Genotype	+/TP	TP/TP	+/TP	TP/TP
day 21	70	130	55	9.04 ± 0.6	8.63 ± 0.34	8.75 ± 0.52	8.58 ± 0.5	8.54 ± 0.47	8.47 ± 0.64	0.706886	0.0971539	0.963932	-1.36036	0.338079	0.253583
day 28	67	124	54	14.92 ± 0.78	14.55 ± 0.42	14.79 ± 0.61	15.47 ± 0.67	15.26 ± 0.63	15.19 ± 0.85	8.12856e-09	0.425652	0.417943	-0.976698	0.676534	0.409143
day 35	67	125	54	18.15 ± 0.54	18.15 ± 0.34	18.23 ± 0.44	19.67 ± 0.53	19.86 ± 0.45	19.61 ± 0.67	5.79854e-34	0.157906	1.42513	0.495267	0.0646866	0.585498
day 42	66	126	53	18.98 ± 0.52	18.69 ± 0.28	19.06 ± 0.41	20.91 ± 0.51	21.12 ± 0.39	21.04 ± 0.53	1.42801e-55	0.226896	0.810405	1.40536	0.246188	0.0900472
day 49	66	125	53	19.73 ± 0.47	19.44 ± 0.26	19.74 ± 0.39	21.6 ± 0.52	22.09 ± 0.36	22.02 ± 0.56	4.40665e-58	0.0509521	1.37682	1.86814	0.0481929	0.0233593
day 56	66	126	54	20.06 ± 0.4	20.02 ± 0.26	20.3 ± 0.39	22.27 ± 0.53	22.68 ± 0.38	22.71 ± 0.55	4.2068e-53	0.0811946	1.0999	2.00654	0.149066	0.0263778
day 63	67	127	53	20.47 ± 0.39	20.45 ± 0.27	21 ± 0.51	22.67 ± 0.63	23.38 ± 0.36	23.19 ± 0.65	9.72037e-55	0.00263335	1.8761	3.09172	0.0146041	0.000769398
day 70	68	127	57	21.06 ± 0.37	21.09 ± 0.31	21.29 ± 0.47	23.28 ± 0.59	23.95 ± 0.35	23.81 ± 0.7	9.4406e-52	0.0242256	1.89558	2.22194	0.016483	0.0165611
1Live weight was measured weekly after weaning until 70 days after birth.
2Live weight was analyzed with a mixed model including sex and genotype as fixed effects and litter as random effect. Statistical significance of each variable and genotype effects compared to +/+ are shown.
p<0.001, <0.01 and <0.05 are colored in pink, orange and yellow, respectively.
