# Supplementary material for: Ectopic Expression of Retrotransposon-Derived PEG11/RTL1 Contributes to the Callipyge Muscular Hypertrophy
Source: PLoS One. 2015 Oct 16;10(10):e0140594. doi: 10.1371/journal.pone.0140594 (PMC4608697; doi:10.1371/journal.pone.0140594)
Supplement: S4 Table — (XLSX) [file pone.0140594.s008.xlsx]

## Sheet: S4 Table
S4 Table. Oligonucleotide information.
Primer name	Primers sequence(5'-3')	Application
S1	ggaacaacactcaaccctatctc	PCR, genotyping (line 126, transgene)	Fig. 1C; Fig. S2B
A1	cggcatcagagcagattgtac	PCR	Fig. 1C
A2	agccctaaatctgaattgccta	"	"
S2	cgcagcctagaactccatcatg	RT-PCR	Fig. 2A
A3	cagtaggcttacggcatggtgtt	"	"
S3	gctcaaggaagacatcaggcagta	"	"
A4	gtagcggcaccacaccatgaa	"	"
S4	tgagccaggaggagcattacca	"	"
A5	actgttgctggttgatgagttggt	"	"
S5	ctgagaaagggcacgcaaccaact	PCR	Fig. 1C
S6	gcaggcagaagagtggtagtca	"	"
A6	aaaccgtctatcagggcgatg	"	"
P126_S1	ggtgactcccataacatccgt	genotyping (line 126, wildtype)	Fig. S2B
P126_A2	tgctctctaatggcgtgtgcta	"	"
P126_A1	gaaggaagaggttccgtctgt	genotyping (line 126, transgene)	"
P127_S1	acacgctggtcttggacgga	genotyping (line 127A, wildtype)	Fig. 2D
P127_A1	agcaacctggaaatgacagcag	genotyping (line 127A, common)	"
Peg11-probe1-S1	cccatgtatgaactccagtgaac	DNA probe for Southern blotting (line 126)	Fig. 1B
peg11-probe1-A1	gtcctccatcctattccttgtctg	"	"
Peg11-probe2-S1	gtataccttatctgacatatgcta	DNA probe for Southern blotting (line 127A)	Fig. S1B
Peg11-probe2-A1	gtcatcaatcatggagctttc	"	"
ovPEG_P_sen1	acagctcaacagtggaggtcatg	oPEG11 RNA probe for Northern blotting	Fig. 2B, 5A
ovPEG_P_ans1_T7	taatacgactcactatagggagaatcagctggcagagcacgatgaa	"	"
S7	cccttcctttctcgccacgttc	Splinkerette PCR	Fig. S2
S8	ctttagggttccgatttagtgct	"	"
S9	cttcttcgcccacttcaactttgac	"	"
S10	ccaccaccaccaggccaacgatg	Splinkerette PCR, genotyping (line 127A, transgene)	Fig. S2; Fig. 2D
SPLK-A	cgaagagtaaccgttgctaggagagaccgtggctgaatgagactggtgtcgacactagtgg	Splinkerette PCR	Fig. S2
SPLK-B	catgccactagtgtcgacaccagtctctaattttttttttcaaaaaaa	"	"
SPLK-E	aattccactagtgtcgacaccagtctctaattttttttttcaaaaaaa	"	"
SPLA1	cgaagagtaaccgttgctaggagagacc	"	"
SPLA2	gtggctgaatgagactggtgtcgac	"	"
PEG-cDNA2	acaacagatggctggcaactagaa	cDNA synthesis	Fig. 2C
qRT-S	ggcagaggctccgcaaga	qRT-PCR	Fig. 2E
qRT-A	cgttttctgattctggggactg
mHprt-S	agctactgtaatgatcagtcaacg	qRT-PCR (reference)	Fig. 2A&E
mHprt-R	agaggtccttttcaccagca
mActg1-S	accaacagcagacttccaggat	qRT-PCR (reference)	Fig. 2A&E
mActg1-R	agactggcaagaaggagtggtaa
mCcdc91-S	cgagctggtggaatacgtgag	qRT-PCR	Fig. 2A
mCcdc91-A	aggcttgacgaccgatggat
mMyh4_probe	aagccctctgctac	qRT-PCR	Fig. S4
mMyh4-S	gctgcctatctgacaagtctg
mMyh4_A	gacatactcattgccgacctt
mMyh1-S	ctccaggctgctttagaggaa
mMyh1-A	cctgctcctaatctcagcatcc
mMyh2-S	aagtgactgtgaaaacagaagca
mMyh2-A	gcagccatttgtaagggttgac
mMyh7-S	acaacccctacgattatgcgt
mMyh7-A	acgtcaaaggcgctatccgtg
5GSP-O	gctggcagagcacgatgaact	RACE	Fig. 2D
5GSP-I	ccactcgctgctgctctctga
3GSP	gacgtcaaggagatgccgaca
